# Supplementary material
Source: publisher figshare collection journal article supplement (https://rs.figshare.com/ndownloader/files/34495242)
Supplement: Supplementary file 1 [file 34495242]

OrID	Location	d13C_permil	d15N_permil
S190021	Savoonga	-15.84	13.48
S190023	Savoonga	-15.43	12.69
S190029	Savoonga	-15.14	14.45
S190030	Savoonga	-15.42	13.28
S190039	Savoonga	-15.21	12.86
S190044	Savoonga	-16.06	12.83
S190047	Savoonga	-15.48	12.49
S190048	Savoonga	-15.41	13.23
S190052	Savoonga	-15.67	13.48
S190060	Savoonga	-16	13.31
G190023	Gambell	-15.8	14.33
G190024	Gambell	-15.86	15.82
G190054	Gambell	-15.99	16.03
G190056	Gambell	-16.54	15.51
